# Supplementary material
Source: PubMed Central journal article supplement (PMC3754197)
Supplement: IAI.00125-13_zii999090283so1.pdf [file IAI.00125-13_zii999090283so1.pdf]

# Supplementary figure 1

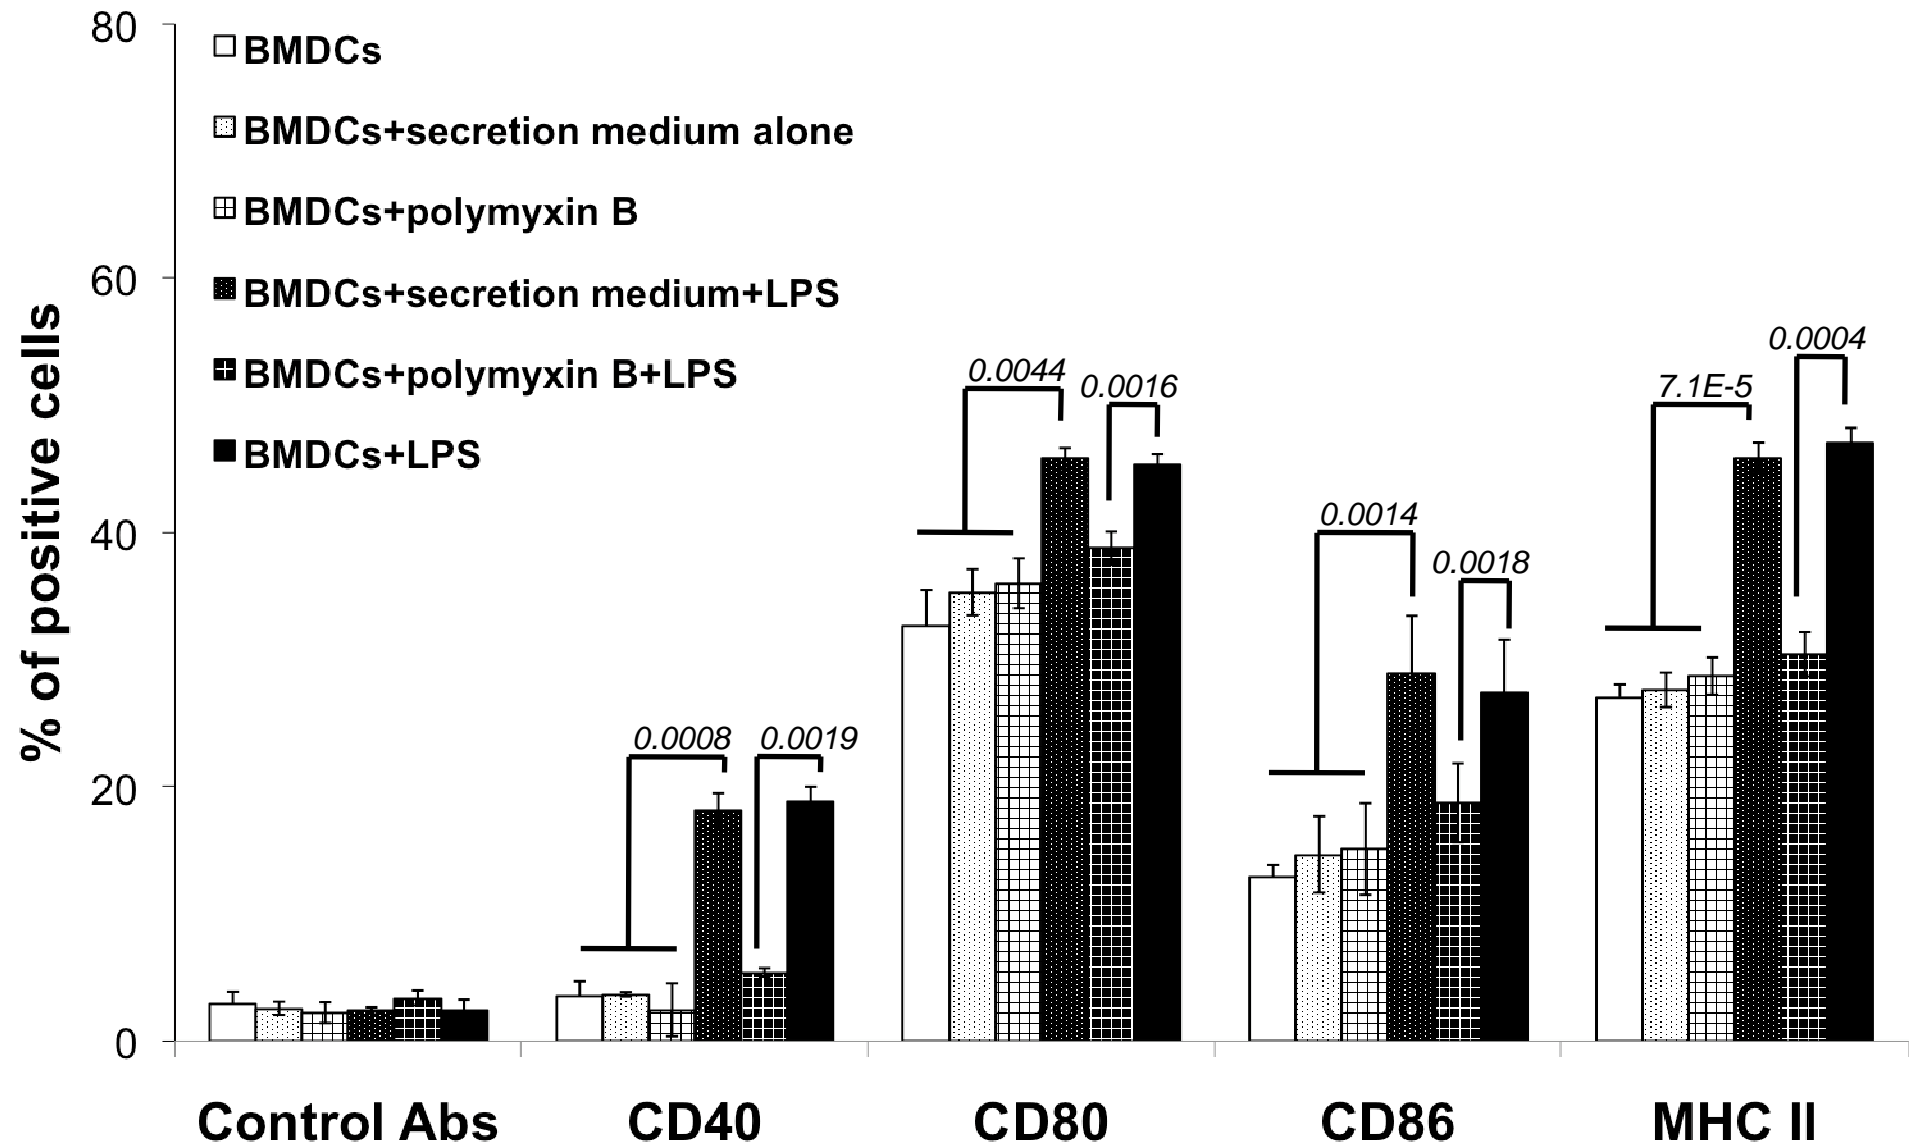

**Supplementary Figure S1.** Controls for validation of *T. b. gambiense* secretome effect on maturation of BMDCs. After stimulation with either secretion medium or polymyxin B (with or without LPS), BMDCs from BALB/c mice were collected in phosphate buffer saline containing 0.1% bovine serum albumin and 0.1% NaN<sub>3</sub> and incubated with monoclonal antibodies (mAbs) for 30 min at 4°C. BMDCs gated for CD11c positivity (R2) were analyzed for changes in CD40, CD80, CD86, and MHC class II molecules expression levels (percent of cells gated in M1):

|                                | Control Abs | CD40       | CD80       | CD86       | MHC II     |
|--------------------------------|-------------|------------|------------|------------|------------|
| BMDCs                          | 2.97±0.91   | 3.53±1.17  | 32.67±2.82 | 12.7±0.93  | 27.05±1.02 |
| BMDCs + secretion medium alone | 2.58±0.52   | 3.68±0.18  | 35.31±1.82 | 14.69±2.99 | 27.63±1.36 |
| BMDCs + polymyxin B            | 2.24±0.82   | 2.46±2.09  | 36.02±1.96 | 15.11±3.6  | 28.71±1.46 |
| BMDCs + secretion medium + LPS | 2.49±0.18   | 18.2±1.3   | 45.82±0.82 | 28.95±4.5  | 45.86±1.21 |
| BMDCs+polymyxin B + LPS        | 3.4±0.58    | 5.41±0.33  | 38.79±1.3  | 18.74±3.1  | 30.43±1.74 |
| BMDCs + LPS                    | 2.48±0.78   | 18.83±1.17 | 45.38±0.78 | 27.42±4.16 | 47.06±1.18 |

Cells in culture medium alone (BMDCs) were used as negative control and those supplemented with LPS as positive control. Data are presented as mean ± standard deviation of triplicates from at least two independent experiments. Statistical significance was analyzed using the Student *t*-test; *p*-values are indicated for each histogram.
